# Supplementary material
Source: PubMed Central journal article supplement (PMC4041522)
Supplement: NIHMS581351-supplement-1.pdf [file NIHMS581351-supplement-1.pdf]

## Supplementary tables

**Supplementary Table 1** Primers used for KCNJ5 amplification.

| Exon            | Oligo sequence                                        |
|-----------------|-------------------------------------------------------|
| <b>Exon 2.1</b> | 2F1 GAGGATTTACGCCCTGAC<br>2R1 CCCGGATATAAGCAATGAGC    |
| <b>Exon 2.2</b> | 2F2 CGCTTCAACTTGCTCGTCTT<br>2R2 ATGAACTCCCCCTCTTTGGT  |
| <b>Exon 2.3</b> | 2F3 TCCAACAACGCAGTCATCTC<br>2R3 CCAGTACCCCTCAAACCACA  |
| <b>Exon 3</b>   | 3F: TTTCCATATCTGGATGGATGG<br>3R: TTTATGGTTCCTCCCCACAG |

**Supplementary Table 2** Primers used for the LOH analysis with the real time PCR

|                                      |                     |
|--------------------------------------|---------------------|
| <b>Mutation 1</b>                    | TGACTCGGAAGCCATACCG |
| <b>Mutation 2</b>                    | TGACTCGGAAGCCATACCT |
| <b><u>Forward primer common:</u></b> | GGCGCTTCAACTTGCTCGT |
